# Supplementary figures and images for: Unusual temperature dependence of elastic constants of an ambient-temperature discotic nematic liquid crystal
Source: Royal Society of Chemistry journal article supplement (doi:10.1039/c6sm00065g), 2016-01-01

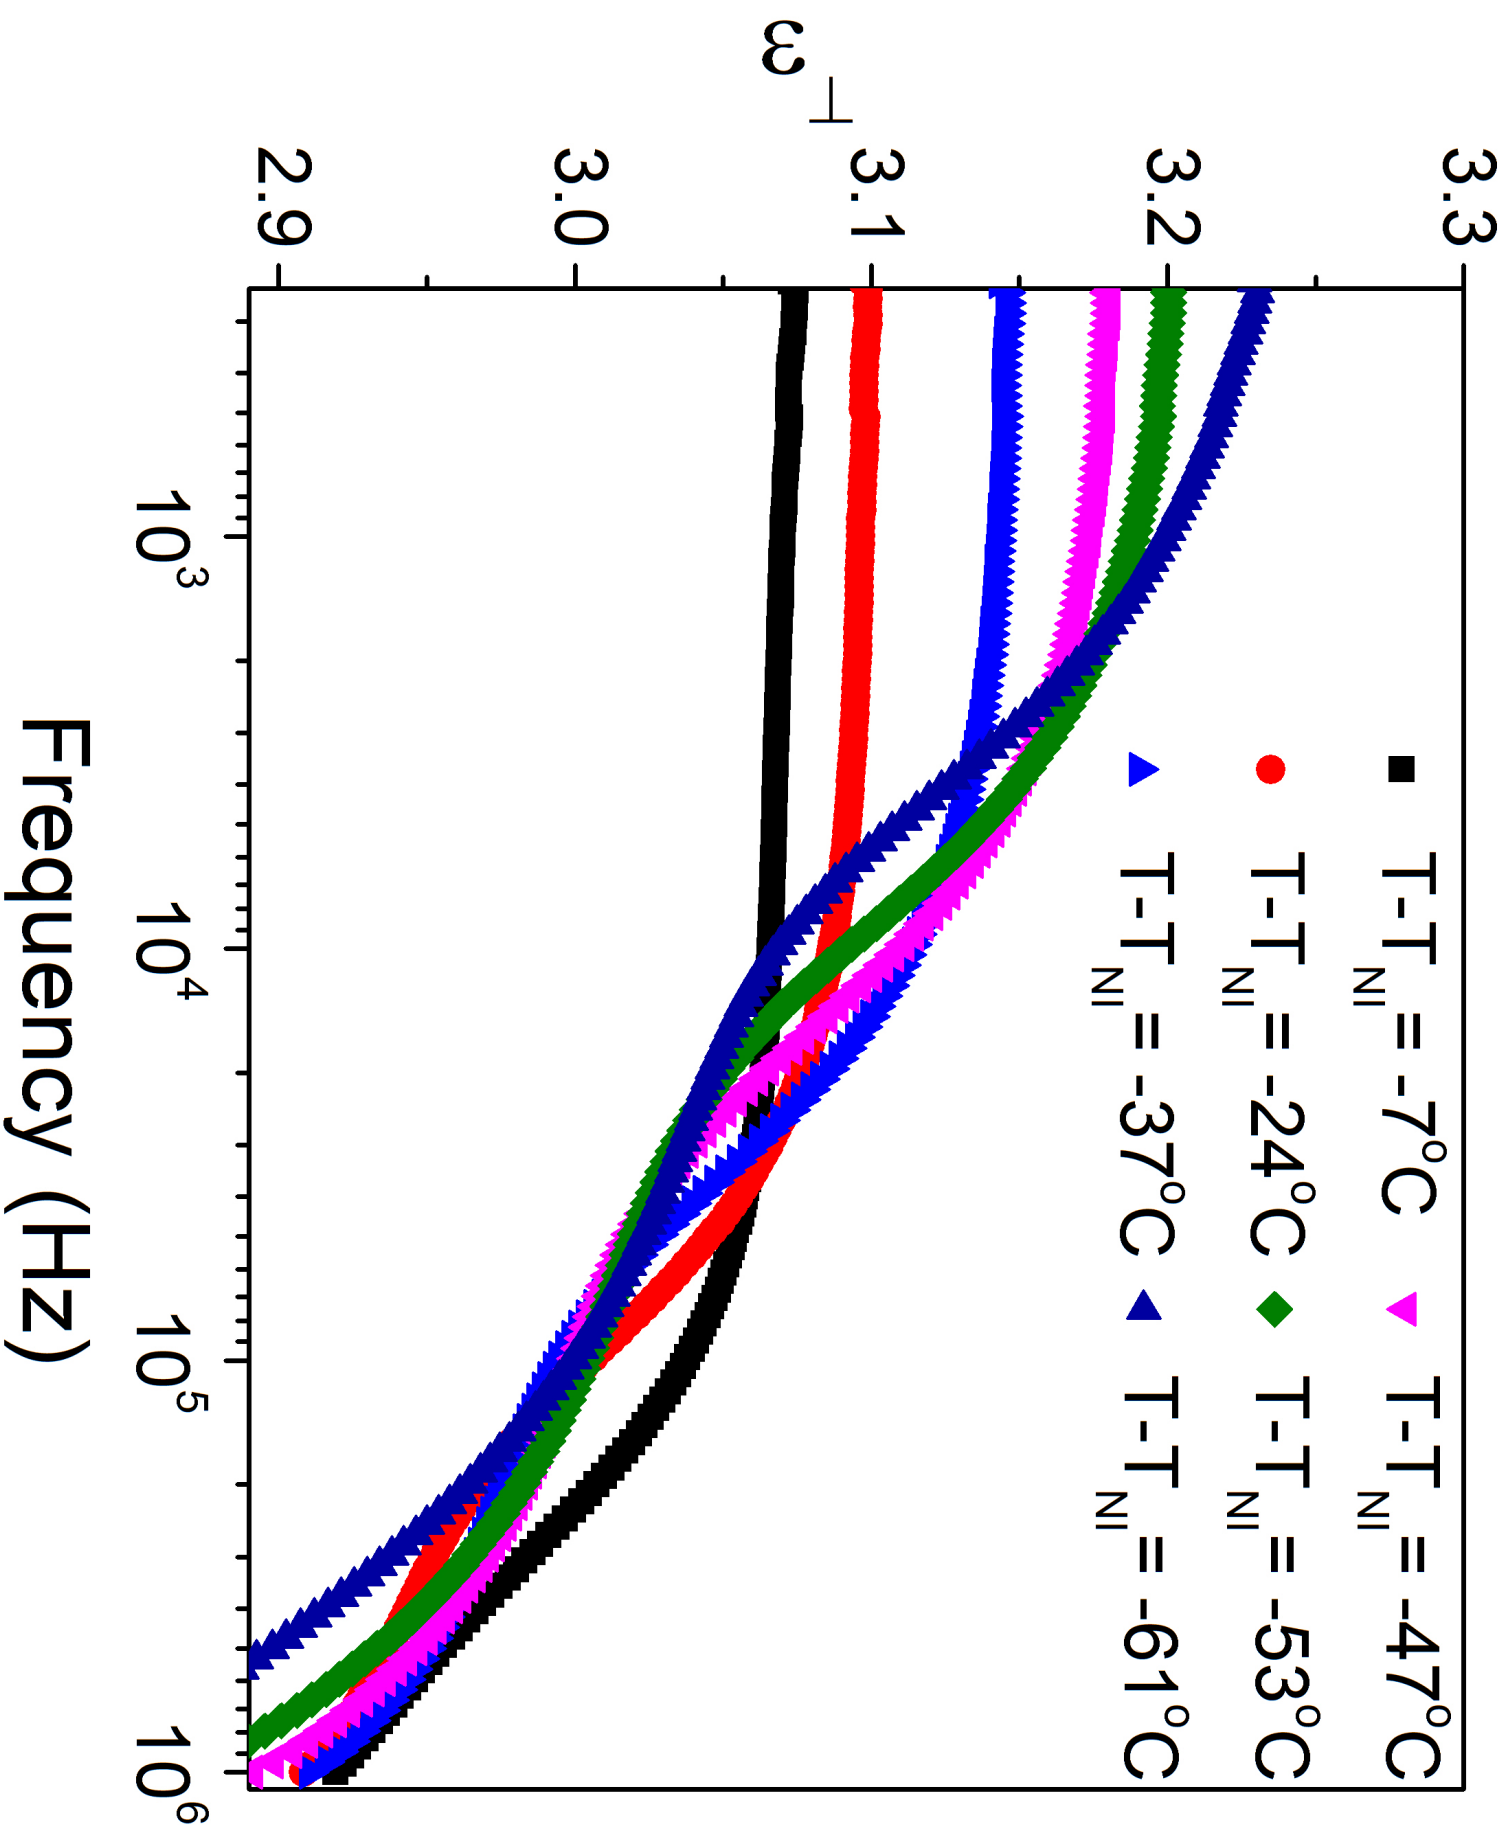

Supplement: c6sm00065g1.pdf [file c6sm00065g1.pdf]
